# Supplementary material for: Fabrication of mesoporous polymer monolith: a template-free approach
Source: Royal Society of Chemistry journal article supplement (doi:10.1039/c1cc12402a), 2011-01-01

## Supporting information

### **Fabrication of Mesoporous Polymer Monolith: A Template-Free Approach**

Keisuke Okada,<sup>a</sup> Mahasweta Nandi,<sup>a</sup> Jun Maruyama,<sup>b</sup> Tatsuya Oka,<sup>a</sup> Takashi Tsujimoto,<sup>a</sup>  
Katsuyoshi Kondoh<sup>c</sup> and Hiroshi Uyama<sup>a,\*</sup>

---

<sup>a</sup>Department of Applied Chemistry, Graduate School of Engineering  
Osaka University  
2-1 Yamadaoka, Suita, Osaka 565-0871, Japan  
Fax: (+)81-6-6879-7467  
E-mail: [uyama@chem.eng.osaka-u.ac.jp](mailto:uyama@chem.eng.osaka-u.ac.jp)  
Homepage : <http://www.chem.eng.osaka-u.ac.jp/~uyamaken/english.pdf>

<sup>b</sup>Environmental Technology Research Division  
Osaka Municipal Technical Research Institute  
1-6-50 Morinomiya, Joto-ku, Osaka 536-8553, Japan

<sup>c</sup>Joining and Welding Research Institute  
Osaka University  
11-1, Mihogaoka, Ibaraki, Osaka, 567-0047, Japan

**Table S1**

|                                  |     | <b>DMSO Composition (Volume %)</b> |    |    |    |     |    |    |    |    |    |    |    |    |    |    |
|----------------------------------|-----|------------------------------------|----|----|----|-----|----|----|----|----|----|----|----|----|----|----|
|                                  |     | 81                                 | 82 | 83 | 84 | 85  | 86 | 87 | 88 | 89 | 90 | 91 | 92 | 93 | 94 | 95 |
| <b>PAN concentration (mg/mL)</b> | 40  | I                                  |    |    |    | D   |    |    |    |    | D  |    |    |    |    |    |
|                                  | 80  | I                                  | B  | B  | B  | B   | B  | B  | B  | B  | B  | D  | D  | D  | D  | D  |
|                                  | 100 |                                    |    |    |    | B   |    |    |    |    | B  |    |    |    |    |    |
|                                  | 120 |                                    |    |    |    | B/C |    |    |    |    | B  |    |    |    |    |    |
|                                  | 140 |                                    |    |    |    | C   |    |    |    |    | C  |    |    |    |    |    |
|                                  | 160 | I                                  | I  | C  | C  | C   | C  | C  | C  | C  | C  | B  | B  |    | D  | D  |
|                                  | 180 |                                    |    |    |    | C   |    |    |    |    | C  |    |    |    |    |    |
|                                  | 200 |                                    |    |    |    | C   |    |    |    |    | C  |    |    |    |    |    |
|                                  | 220 |                                    |    |    |    | C   |    |    |    |    | C  |    |    |    |    |    |
|                                  | 240 |                                    |    |    |    | C   |    |    |    |    | C  |    | C  |    |    |    |

I: PAN was Insoluble at any temperature

D: PAN was dissolved at any temperature

B: Porous PAN with Bicontinuous structure was obtained

C: Porous PAN with Closed pore was obtained

**Table S2**

| Sample    | Second heating condition |                 |                            | BET Surface Area<br>(m <sup>2</sup> g <sup>-1</sup> ) |
|-----------|--------------------------|-----------------|----------------------------|-------------------------------------------------------|
|           | Ar/CO <sub>2</sub>       | Temperature (K) | Hold Time <sup>a</sup> (h) |                                                       |
| <b>C1</b> | 100/0                    | 1573            | 0                          | 19                                                    |
| <b>C2</b> | 100/0                    | 1173            | 1                          | 1                                                     |
| <b>C3</b> | 75/25                    | 1173            | 1                          | 970                                                   |
| <b>C4</b> | 75/25                    | 1173            | 2                          | 1300                                                  |

<sup>a</sup>Hold time = Duration for which the sample was maintained at the heating temperature

**Figure S1**

SEM image of activated carbon monolith

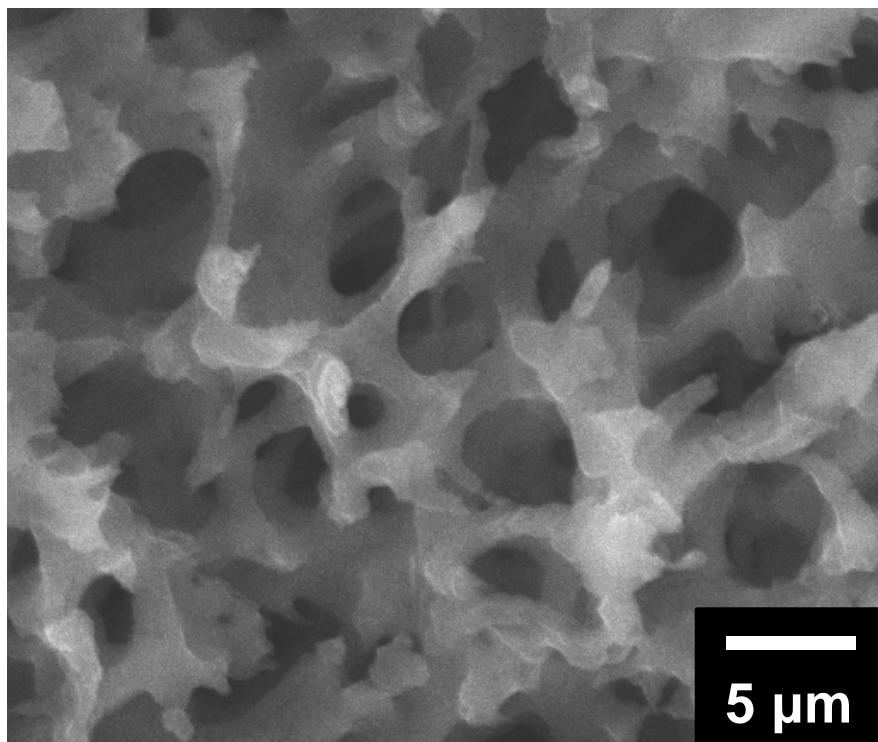

**Figure S2**

Nitrogen-adsorption desorption isotherm of activated carbon monolith

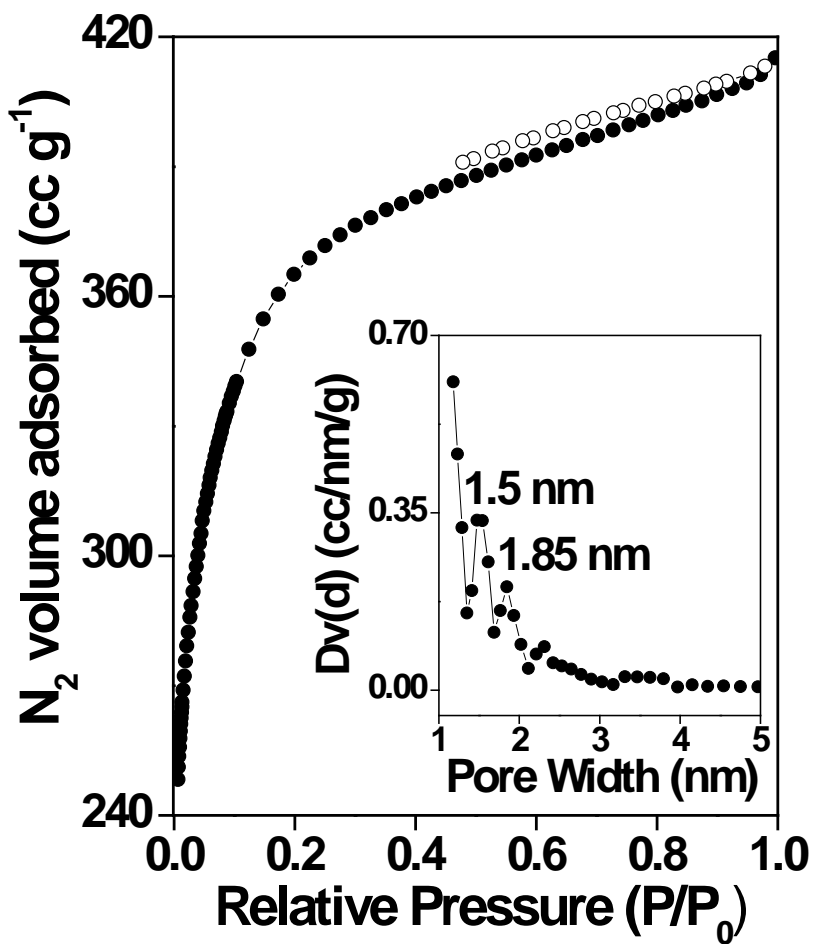

Supplement: c1cc12402a.pdf [file c1cc12402a.pdf]
